# Supplementary material
Source: Springer Nature journal article supplement (https://www.springermedizin.de/resource/supplementary/12913_2013_2971_MOESM5_ESM.pdf/9532496)
Supplement: MOESM5 [file 9532496]

Convenience for family members to visit the resident  
 LTC facilities proximity to home

Had visited at least 4 LTC facilities  
 Had visited SCWIs  
 Environmental cleanliness  
 Had visited 1 LTC facilities  
 Had visited SCWIs  
 College above  
 Senior high school  
 Age: 41-50 years  
 Self-perceived financial status was good  
 Age: Less than 40 years  
 Grandchildren  
 More than 100 beds  
 Paid by resident  
 Had visited NHs  
 Lived in LTC facility: Less than 1 year

NHS

Relatives and friends engaged in LTC-related field

Had visited community care facility

Family members learn from other of the LTC facilities
